# Supplementary material for: Functional Analysis of a Novel, Non-Canonical RPGR Splice Variant Causing X-Linked Retinitis Pigmentosa
Source: MDPI journal article supplement (doi:10.3390/genes14040934), 2023-04-18

Overview of Transcript NM\_001034853.2 (RPGR)

RPGR - Retinitis pigmentosa GTPase regulator | GRCh37 (Chr X) |

gnomAD SCORES

OMIM®

BRIDGES

RefSeq; MANE Select

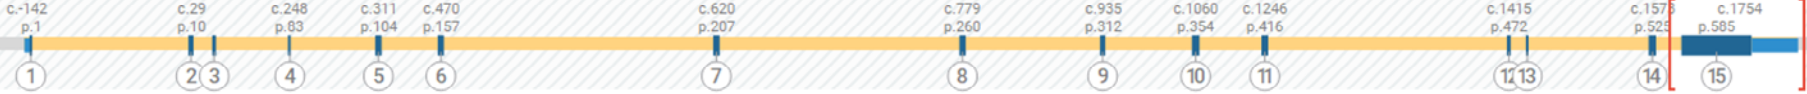

Del/Delins  
Ins/Dup  
Subst

Targets (exons)  
Max Depth: 278x

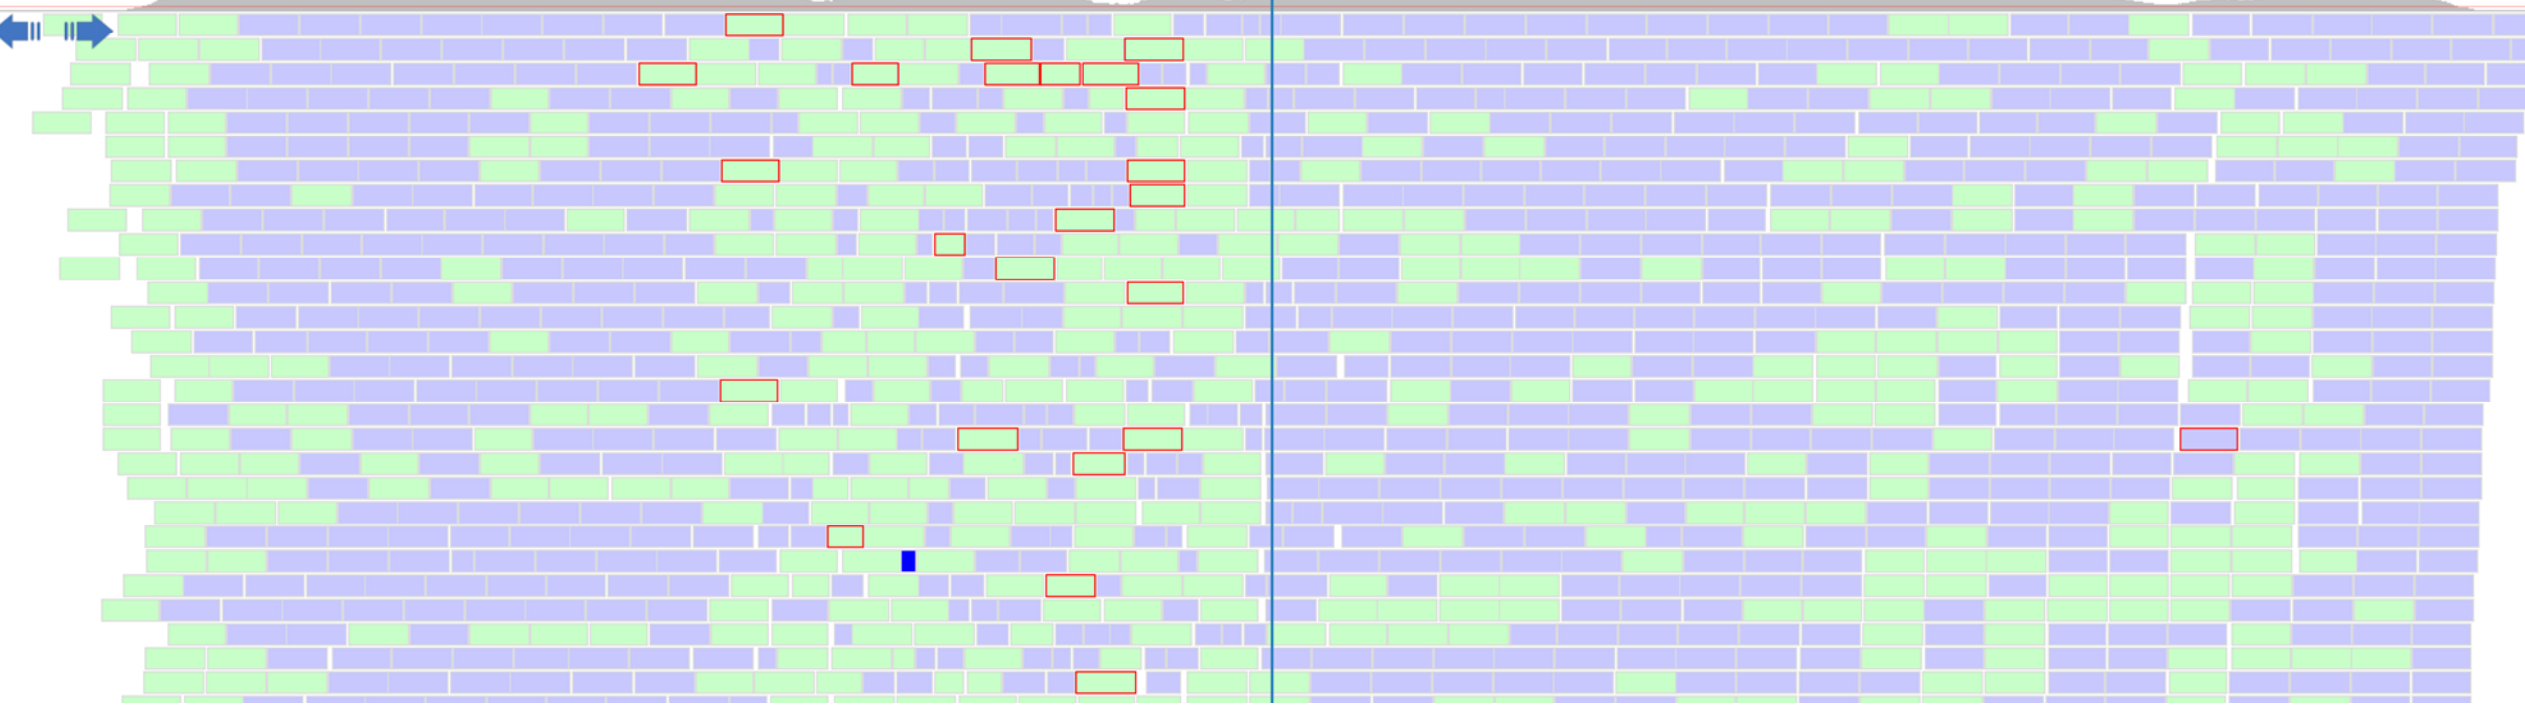

Supplement: s1 [file s1]
