# Supplementary figures and images for: Functional Analysis of a Novel, Non-Canonical RPGR Splice Variant Causing X-Linked Retinitis Pigmentosa
Source: MDPI journal article supplement (doi:10.3390/genes14040934), 2023-04-18

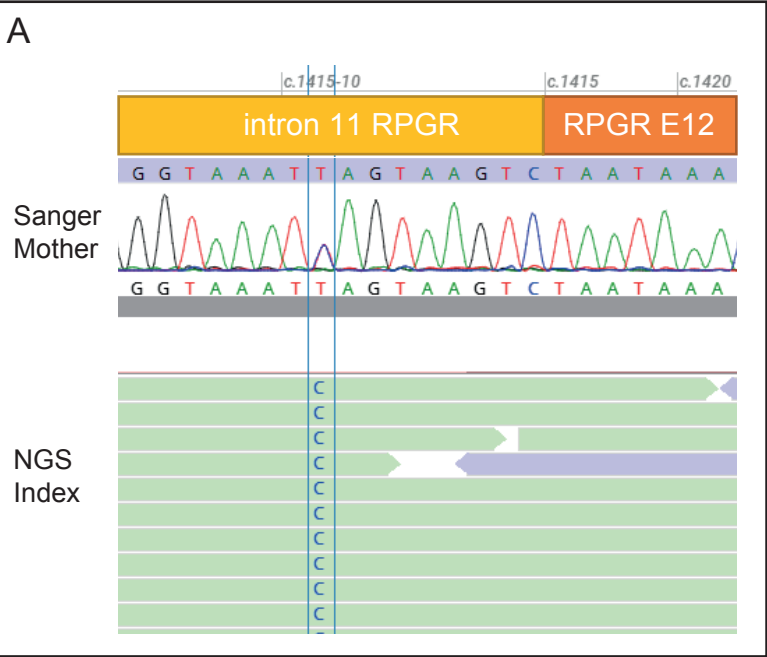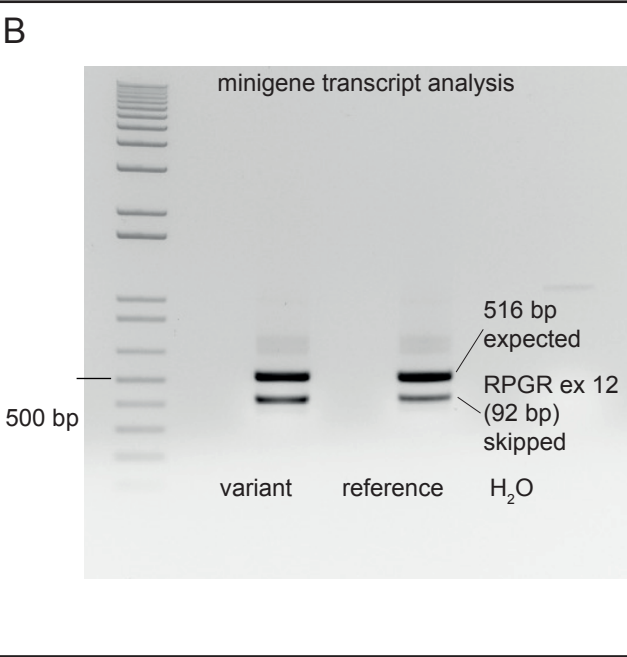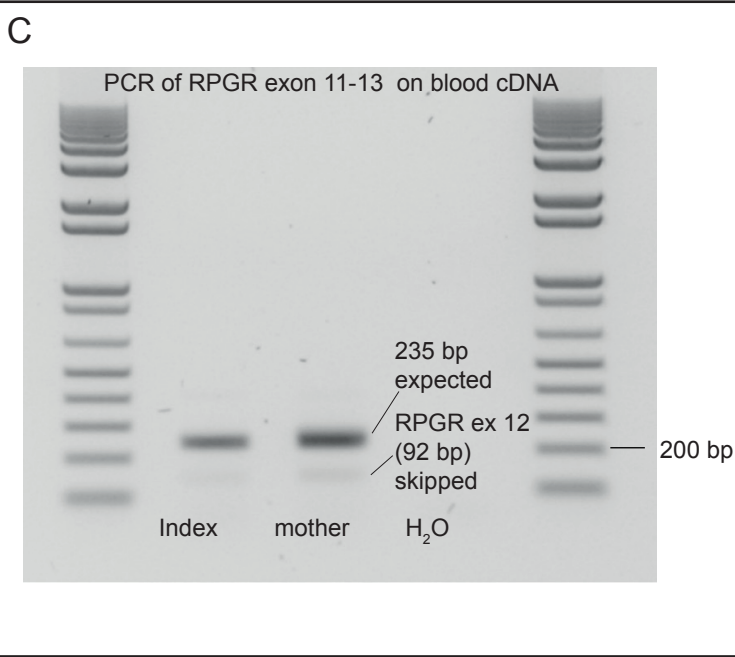

Supplement: s1 [file s1]
